# Supplementary material
Source: publisher figshare collection journal article supplement (https://acs.figshare.com/ndownloader/files/14941916)
Supplement: Supplementary file 1 [file 14941916]

## Supporting Information

### **The sulfur mustard analog mechlorethamine (bis(2-chloroethyl)methylamine) modulates cell cycle progression via the DNA damage response in human lung epithelial A549 cells**

Yi-Hua Jan<sup>†</sup>, Diane E. Heck<sup>‡</sup>, Debra L. Laskin<sup>||</sup> and Jeffrey D. Laskin<sup>†\*</sup>

<sup>†</sup>Department of Environmental and Occupational Health, Rutgers University School of Public Health, Piscataway, NJ, 08854, United States, <sup>‡</sup>Department of Environmental Health Science, New York Medical College, Valhalla, NY, 10595, United States, <sup>||</sup>Department of Pharmacology and Toxicology, Rutgers University, Piscataway, NJ 08854, United States.

\*Corresponding Author: Jeffrey D. Laskin; Tel: 848-445-0170; Fax: 732-445-0119;  
E-mail: [jlaskin@ehsi.rutgers.edu](mailto:jlaskin@ehsi.rutgers.edu)

## Table of Contents

**Figure S1.** Effects of HN2 on cell cycle distribution in asynchronous and synchronized A549 cells

**Figure S1****A**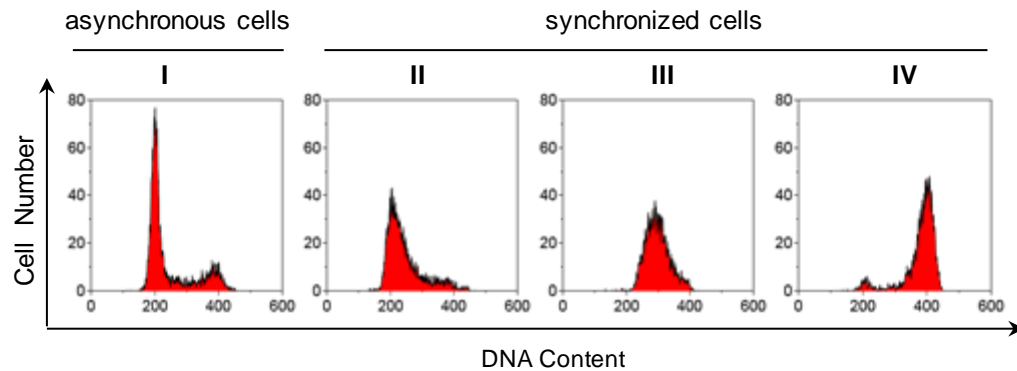**B** Percentage of cells in the G0/G1 phase after HN2 treatment

| HN2 ( $\mu$ M) | asynchronous cells (I) | synchronized cells (II) | synchronized cells (III) | synchronized cells (IV) |
|----------------|------------------------|-------------------------|--------------------------|-------------------------|
| 0              | $73.8 \pm 2.4$         | $73.3 \pm 3.8$          | $71.8 \pm 2.2$           | $74.8 \pm 6.4$          |
| 1              | $49.7 \pm 4.6$         | $50.0 \pm 2.3$          | $49.3 \pm 3.6$           | $49.2 \pm 3.2$          |
| 2              | $28.5 \pm 3.5$         | $25.1 \pm 0.8$          | $24.2 \pm 1.2$           | $24.5 \pm 4.4$          |
| 5              | $19.5 \pm 5.5$         | $14.8 \pm 2.5$          | $18.5 \pm 2.2$           | $25.4 \pm 4.2$          |
| 10             | $16.3 \pm 1.9$         | $14.2 \pm 1.5$          | $18.4 \pm 1.2$           | $19.3 \pm 2.9$          |
| 20             | $26.8 \pm 1.5$         | $17.5 \pm 4.5$          | $23.2 \pm 2.4$           | $28.8 \pm 1.6$          |

Percentage of cells in the S phase after HN2 treatment

| HN2 ( $\mu$ M) | asynchronous cells (I) | synchronized cells (II) | synchronized cells (III) | synchronized cells (IV) |
|----------------|------------------------|-------------------------|--------------------------|-------------------------|
| 0              | $15.4 \pm 2.1$         | $17.6 \pm 0.8$          | $14.5 \pm 1.2$           | $13.8 \pm 2.7$          |
| 1              | $19.1 \pm 2.7$         | $13.7 \pm 0.2$          | $18.4 \pm 2.1$           | $16.8 \pm 1.5$          |
| 2              | $35.4 \pm 5.5$         | $36.7 \pm 1.1$          | $40.2 \pm 4.1$           | $38.5 \pm 4.3$          |
| 5              | $58.9 \pm 4.1$         | $54.6 \pm 3.1$          | $59.5 \pm 3.6$           | $52.6 \pm 2.2$          |
| 10             | $69.0 \pm 3.2$         | $64.5 \pm 4.5$          | $58.4 \pm 3.5$           | $62.1 \pm 5.5$          |
| 20             | $58.9 \pm 1.7$         | $67.4 \pm 5.9$          | $57.6 \pm 2.0$           | $52.9 \pm 2.7$          |

Percentage of cells in the G2/M phase after HN2 treatment

| HN2 ( $\mu$ M) | asynchronous cells (I) | synchronized cells (II) | synchronized cells (III) | synchronized cells (IV) |
|----------------|------------------------|-------------------------|--------------------------|-------------------------|
| 0              | $9.2 \pm 0.7$          | $7.5 \pm 0.8$           | $12.4 \pm 1.4$           | $9.5 \pm 1.8$           |
| 1              | $29.9 \pm 4.6$         | $33.3 \pm 4.3$          | $30.3 \pm 1.0$           | $32.2 \pm 2.3$          |
| 2              | $32.8 \pm 1.9$         | $34.1 \pm 0.6$          | $34.2 \pm 1.9$           | $35.0 \pm 1.1$          |
| 5              | $18.9 \pm 2.1$         | $26.1 \pm 2.6$          | $20.5 \pm 1.2$           | $18.5 \pm 2.0$          |
| 10             | $12.4 \pm 1.0$         | $17.7 \pm 0.5$          | $20.4 \pm 1.9$           | $17.1 \pm 3.1$          |
| 20             | $12.2 \pm 1.0$         | $11.7 \pm 1.9$          | $17.3 \pm 1.4$           | $15.8 \pm 4.0$          |

**Figure S1.** Effects of HN2 on cell cycle distribution in asynchronous and synchronized A549 cells. Cells were cultured in DMEM growth medium (asynchronous cells) or synchronized at the G1/S boundary using a serum starvation (24 h)-thymidine (2 mM, 24 h) block. After the cell cycle block, cells were washed with HBSS and then cultured in complete growth medium for 0-12 h. Cells were then treated with increased concentrations of HN2 (1-20  $\mu$ M) or vehicle controls. After 24 h, cell cycle profiles were analyzed by flow cytometry. (A) Representative cytograms of asynchronous (I) and synchronized cells after serum starvation/thymidine block release at 0 h (II), 3 h (III), and 8 h (IV). (B) Percentage of cells in each phase of cell cycle in asynchronous and synchronized A549 cells after HN2 treatment. Data are presented as means  $\pm$  SE, n = 3. For each data set, a non-linear regression analysis comparing synchronized and asynchronous cells was performed and tested for statistical significance by chi-square test using SigmaPlot software. Cell cycle distribution in asynchronous and synchronous cells were not significantly different at  $p < 0.05$ .
